# Supplementary material for: Significant electrochemical stability of manganese dioxide/polyaniline coaxial nanowires by self-terminated double surfactant polymerization for pseudocapacitor electrode
Source: Royal Society of Chemistry journal article supplement (doi:10.1039/c2jm32456c), 2012-01-01
Supplement: c2jm32456c.pdf [file c2jm32456c.pdf]

Electronic Supporting Information (ESI) for

## Significant Electrochemical Stability of Manganese Dioxide/Polyaniline Coaxial Nanowires by Self-Terminated Double Surfactant Polymerization for Pseudocapacitor Electrode

Afriyanti Sumboja,<sup>a</sup> Ce Yao Foo,<sup>a</sup> Jian Yan,<sup>a</sup> Chaoyi Yan,<sup>a</sup> Raju Kumar Gupta<sup>a</sup> and Pooi See Lee<sup>\*a</sup>

<sup>a</sup> School of Materials Science and Engineering Nanyang Technological University, 50 Nanyang Avenue, Singapore 639798.

\*Email: [pslee@ntu.edu.sg](mailto:pslee@ntu.edu.sg)

**Fig. S1.** TEM image of MnO<sub>2</sub>/Pani coaxial NW synthesized at (a) lower HCl concentration (0.01 M); (b) lower monomer concentration (0.004 ml); (c) lesser 0.1 M HCl (10 ml); (d) higher MnO<sub>2</sub> NW (100 mg).

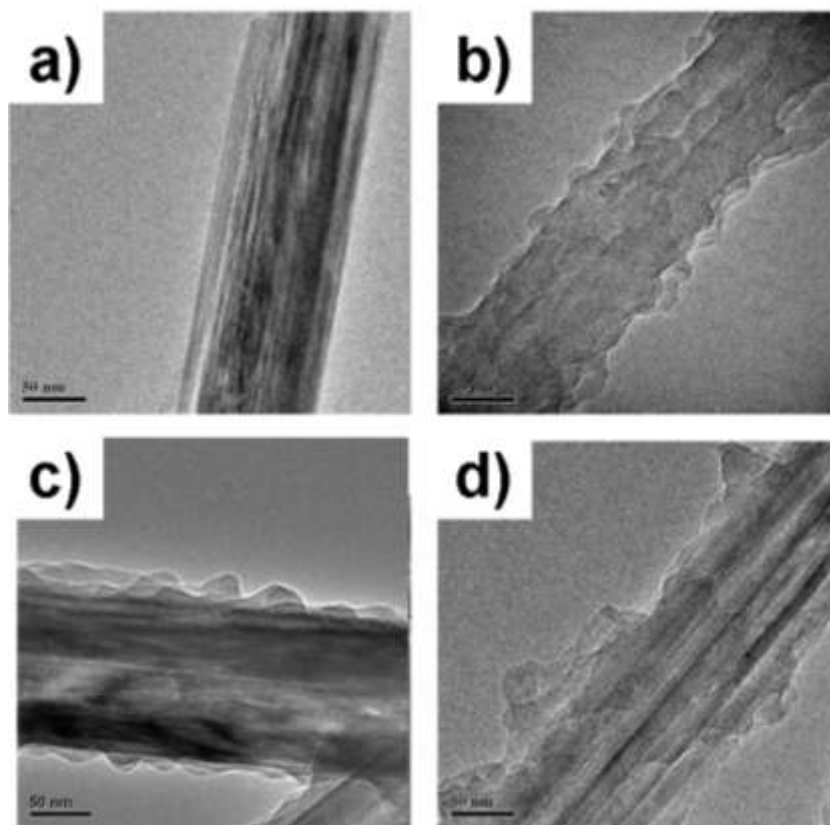

Fig. S1a shows the image of MnO<sub>2</sub>/Pani coaxial NW sample synthesized by using 0.01 M HCl while keeping the other synthesis parameter constant. No Pani coating was seen on the MnO<sub>2</sub> nanowires due to the low concentration of H<sup>+</sup> during the polymerization process. Fig. S1b shows thinner coating of Pani with less protrusion morphology resulted from polymerization process with 0.004 mL aniline monomer. The thickness of Pani coating on MnO<sub>2</sub> nanowires can be conveniently adjusted by varying the aniline monomer concentration. Fig. S1c shows TEM image of the sample at slightly smaller amount of 0.1 M of HCl (10 mL, instead of 15 mL) which shows the presence of MnO<sub>2</sub> NW in the sample. The corresponding TEM image Fig. S1d shows very little amount of Pani attached on the MnO<sub>2</sub> NW when the double the amount of MnO<sub>2</sub> is added during Pani polymerization.

**Fig. S2.** Mn 2p XPS core level spectra of Pani/MnO<sub>2</sub> coaxial NW

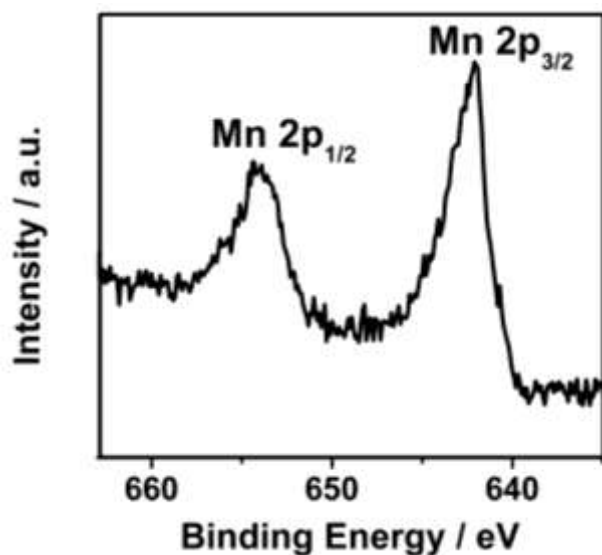

The presence of MnO<sub>2</sub> in MnO<sub>2</sub>/Pani coaxial NW is confirmed by XPS characterization. The peaks of Mn 2p<sub>3/2</sub> and Mn 2p<sub>1/2</sub>, which are centered at 642 and 653.9 eV, respectively, are in good agreement with reported data of Mn 2p<sub>3/2</sub> and Mn 2p<sub>1/2</sub> in MnO<sub>2</sub> NW (Fig. 3a in the main text).

**Fig. S3.** (a) Charge and discharge curve of MnO<sub>2</sub>/Pani coaxial NW at 10 A g<sup>-1</sup>(1) and 15 A g<sup>-1</sup>(3); MnO<sub>2</sub> NW at 10 A g<sup>-1</sup>(2) and 15 A g<sup>-1</sup>(5); Pani at 10 A g<sup>-1</sup>(4) and 15 A g<sup>-1</sup>(6). (b) Charge and discharge curve

of  $\text{MnO}_2/\text{Pani}$  coaxial NW at  $20 \text{ A g}^{-1}$ (1) and  $30 \text{ A g}^{-1}$ (2);  $\text{MnO}_2$  NW at  $20 \text{ A g}^{-1}$ (3) and  $30 \text{ A g}^{-1}$ (5) Pani at  $20 \text{ A g}^{-1}$ (4) and  $30 \text{ A g}^{-1}$ (6).

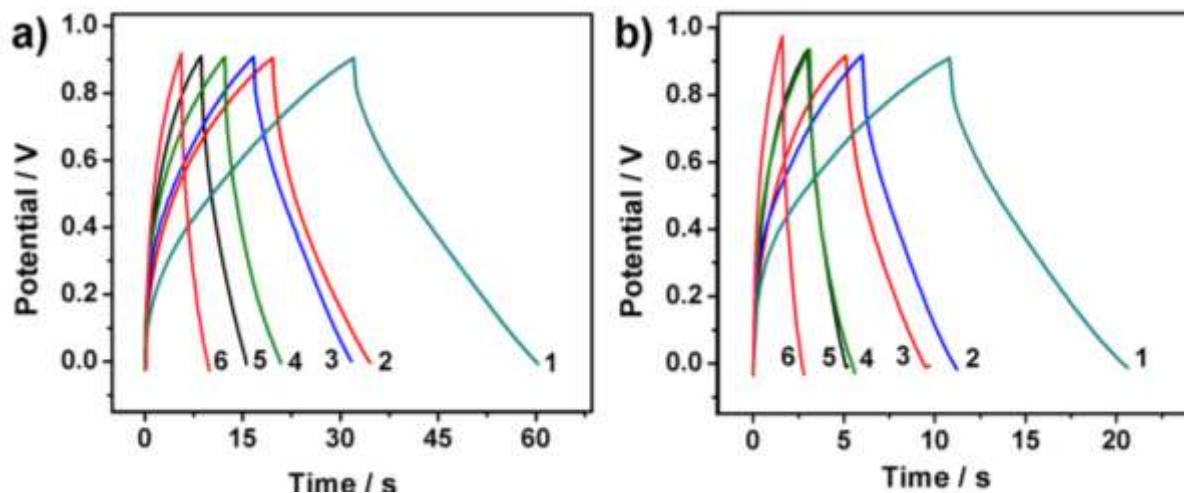

The charge/discharge time of  $\text{MnO}_2$  NW samples improve significantly after coating a layer of Pani especially at high applied current. This concludes that the specific capacitance of the  $\text{MnO}_2/\text{Pani}$  is increased based on the calculation method in S14.

**Fig. S4.** Charge and discharge curve of  $\text{MnO}_2/\text{Pani}$  coaxial NW at  $0.25 \text{ A g}^{-1}$  (1);  $0.5 \text{ A g}^{-1}$  (2);  $1 \text{ A g}^{-1}$  (3); and  $2 \text{ A g}^{-1}$  (4)

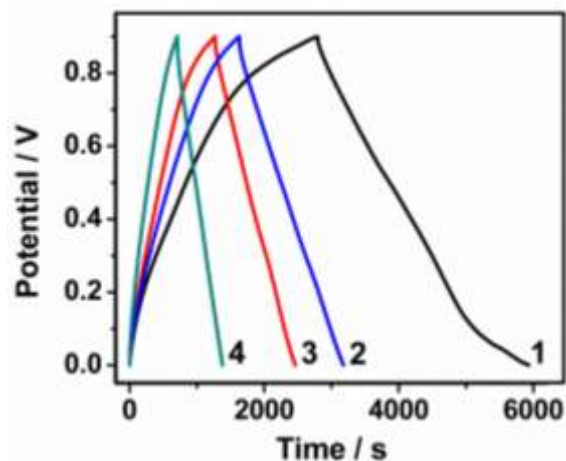

The charge discharge curve of  $\text{MnO}_2/\text{Pani}$  coaxial NW at lower applied current:  $0.25$ ,  $0.5$ ,  $1$  and  $2 \text{ A g}^{-1}$  are shown in Fig. S4. The resultant  $C_{\text{sp}}$  are much higher than references listed in Table S1 (Page 4):  $873$ ,  $663$ ,  $574$  and  $498 \text{ F g}^{-1}$ .

**Fig. S5.** Cyclic voltammograms of MnO<sub>2</sub> NW, MnO<sub>2</sub>/Pani coaxial NW and Pani at 50 mV s<sup>-1</sup>.

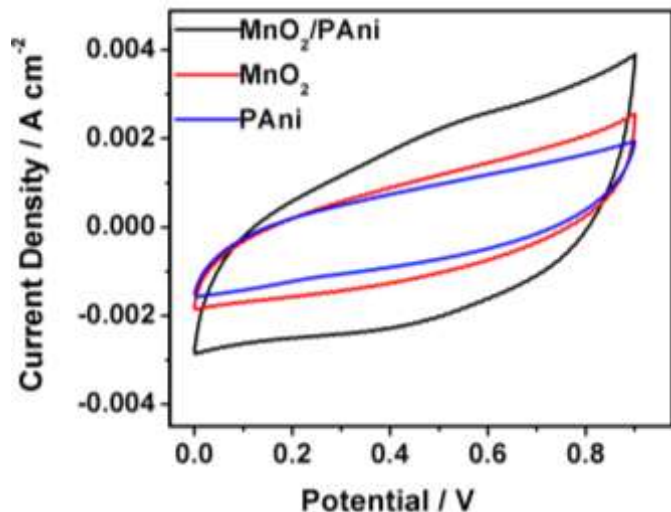

From this figure we can see that MnO<sub>2</sub>/Pani coaxial NW shows better capacitive performance at every scan rate, especially at high scan rate (50 mV s<sup>-1</sup>). The cyclic voltammogram of MnO<sub>2</sub>/Pani is able to maintain the rectangular shape at high scan rate, which suggest the capacitive property is well maintained as compared to other two samples.

**Table S1.** Literature data on Pani/MnO<sub>2</sub> based electrodes for supercapacitor application

| Material                       | Synthesis Method         | Structure                 | C <sub>sp</sub> (Fg <sup>-1</sup> ) | Cycling Performance (% degradation, no of cycle) | Reference    |
|--------------------------------|--------------------------|---------------------------|-------------------------------------|--------------------------------------------------|--------------|
| MnO/Poly(aniline-co-anisidine) | Chemical/Solution method | Nanostructure             | 262                                 | 10 %, 1000 cycles                                | <sup>1</sup> |
| Pani/MnO <sub>2</sub> /CNT     | Chemical/Solution method | Ternary coaxial structure | 330                                 | 23 %, 1000 cycles                                | <sup>2</sup> |
| Pani/MnO                       | Chemical/Solution        | Pani intercalated         | 330                                 | 6 %, 1000 cycles                                 | <sup>3</sup> |

|                                       | method                            | MnO                                                  |                                                                   |                    |               |
|---------------------------------------|-----------------------------------|------------------------------------------------------|-------------------------------------------------------------------|--------------------|---------------|
| Pani-PEDOT-<br>PSS/MnO <sub>2</sub>   | Chemical and<br>Electrodeposition | Nanostructure                                        | 372                                                               | 32 %, 500 cycles   | <sup>4</sup>  |
| Pani/MnO <sub>2</sub> /CNT            | Chemical/Solution<br>method       | Ternary Coaxial<br>structure                         | 384                                                               | 20 %, 1000 cycles  | <sup>5</sup>  |
| Pani/MnO <sub>2</sub> /AC             | Coelectrodeposition               | Fibers                                               | 408                                                               | 18 %, 1500 cycles  | <sup>6</sup>  |
| Pani/MnO                              | Coelectrodeposition               | Nanoparticle                                         | 415                                                               | 15 %, 1000 cycles  | <sup>7</sup>  |
| Pani/MnO                              | Chemical/Solution<br>method       | Film on porous<br>carbon                             | 500                                                               | 40 %, 5000 cycles  | <sup>8</sup>  |
| Pani/MnO <sub>2</sub>                 | Chemical/Solution<br>method       | MnO <sub>2</sub><br>nanoparticles on<br>Pani support | 510                                                               | -                  | <sup>9</sup>  |
| Pani/MnO <sub>2</sub>                 | Coelectrodeposition               | Fibrous structure                                    | 532                                                               | 24 %, 1200 cycles  | <sup>10</sup> |
| Pani/MnO <sub>2</sub>                 | Coelectrodepositin                | Fibers                                               | 588                                                               | 10 %, 1200 cycles  | <sup>11</sup> |
| Pani/MnO <sub>2</sub>                 | 2 steps<br>electrodeposition      | Cornlike<br>nanostructure                            | 715                                                               | 3.5 %, 5000 cycles | <sup>12</sup> |
| Pani/MnO                              | Chemical/Solution<br>method       | Nanotube                                             | 626                                                               | 33 %, 1000 cycles  | <sup>13</sup> |
| Current work<br>Pani/MnO <sub>2</sub> | Chemical/Solution                 | Coaxial<br>nanowires<br>electrostatically<br>bonded  | 498 at 2<br>Ag <sup>-1</sup> , 873<br>at 0.25<br>Ag <sup>-1</sup> | 5 %, 5000 cycles   |               |

## S6. Calculations

For supercapacitor application, the specific capacitance of active materials can be calculated from charge discharge and cyclic voltammetry test. The discharge specific capacitance is calculated according to this calculation:

$$C_{sp} = (I \times \Delta t) / (m \times \Delta V).$$

I is the applied current,  $\Delta t$  is the discharge time, m is the active mass of the electrode, and  $\Delta V$  is the voltage window of the test

The specific capacitance according the cyclic voltammogram is calculated according to the following equation:

$$C_{sp} = Q / (m \times \Delta V)$$

Q is the charge which is calculated from the area under the discharge curve over the scan rate.

## References

1. X. F. Yang, G. C. Wang, R. Y. Wang and X. W. Li, *Electrochim. Acta*, 2010, **55**, 5414-5419.
2. Q. Li, J. Liu, J. Zou, A. Chunder, Y. Chen and L. Zhai, *J. Power Sources*, 2011, **196**, 565-572.
3. X. Zhang, L. Y. Ji, S. C. Zhang and W. S. Yang, *J. Power Sources*, 2007, **173**, 1017-1023.
4. F. J. Liu, *J. Power Sources*, 2008, **182**, 383-388.
5. C. Yuan, L. Su, B. Gao and X. Zhang, *Electrochim. Acta*, 2008, **53**, 7039-7047.
6. W. Y. Zou, W. Wang, B. L. He, M. L. Sun and Y. S. Yin, *J. Power Sources*, 2010, **195**, 7489-7493.
7. L. Chen, L. J. Sun, F. Luan, Y. Liang, Y. Li and X. X. Liu, *J. Power Sources*, 2010, **195**, 3742-3747.
8. Z. Zhou, N. Cai and Y. Zhou, *Mater. Chem. Phys.*, 2005, **94**, 371-375.
9. W. Ni, D. Wang, Z. Huang, J. Zhao and G. Cui, *Mater. Chem. Phys.*, 2010, **124**, 1151-1154.
10. L. J. Sun and X. X. Liu, *Eur. Polym. J.*, 2008, **44**, 219-224.
11. L. J. Sun, X. X. Liu, K. K. T. Lau, L. Chen and W. M. Gu, *Electrochim. Acta*, 2008, **53**, 3036-3042.
12. K. R. Prasad and N. Miura, *Electrochem. Solid-State Lett.*, 2004, **7**, A425-A428.
13. Jaidev, R. I. Jafri, A. K. Mishra and S. Ramaprabhu, *J. Mater. Chem.*, 2011, **21**, 17601-17605.
